# Supplementary material
Source: Copernicus journal article supplement (doi:10.5194/ar-2026-20)

## Look-up tables for complex refractive index correction of particle sizes measured by common research-grade optical particle counters

**Fig. S1.** Scattering cross section ( $C_{sca}$ ) as a function of particle size for various ranges of the real part (left column) and the imaginary part (right) of the complex refractive index  $m$ . The dependence on the real part is shown in three ranges: 1.33-1.45; 1.45-1.55 and larger than 1.55. The dependence on the imaginary part is shown in three ranges: 0 (aerosols not absorbing); smaller than 0.1 and larger than 0.1. From top to bottom: UHSAS, PCASP, FSSP, GRIMM/Sky-GRIMM, CDP.

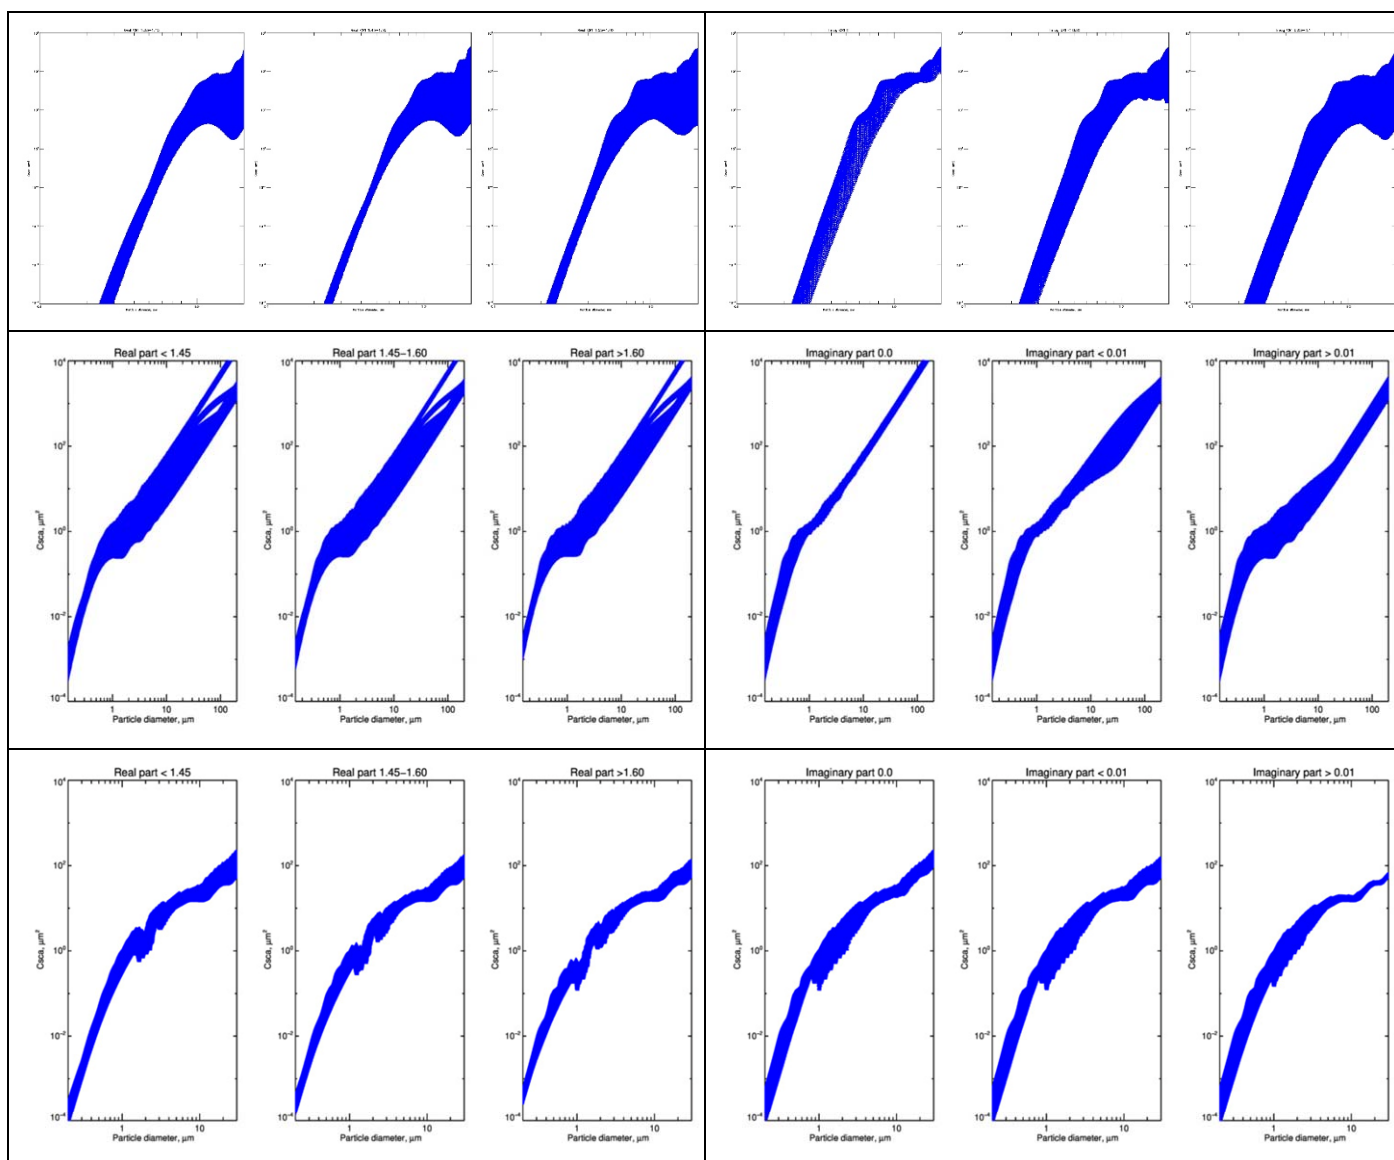

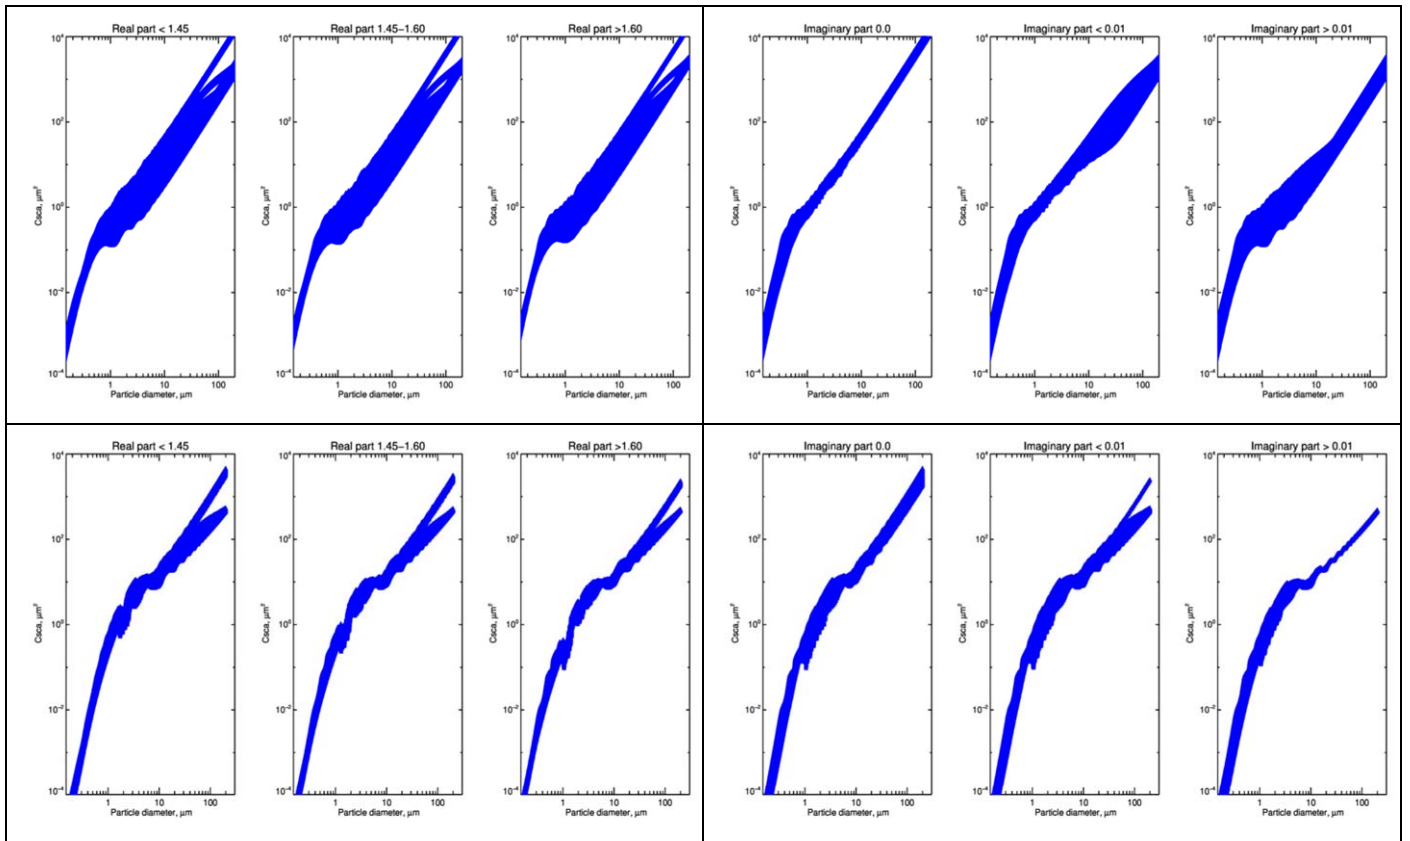

Supplement: Supplementary file 1 [file ar-2026-20-supplement.pdf]
